# Supplementary material
Source: publisher figshare collection journal article supplement (https://acs.figshare.com/ndownloader/files/3754192)
Supplement: Supplementary file 1 [file 3754192]

  
data_CaP1
_publ_requested_journal          Inorg. Chem.
_publ_contact_author_name        'Fa-Nian Shi'
_publ_contact_author_address     
;CICECO - Aveiro Institute of Materials
Department of Chemistry
University of Aveiro
3810-193
Aveiro, Portugal
;
_publ_contact_author_email       fshi@ua.pt
_publ_contact_author_phone       '+351 234401520'
_publ_contact_author_fax         '+351 234370084'
loop_
_publ_author_name
_publ_author_address
'Shi, Fa-Nian '
;CICECO - Aveiro Institute of Materials
Department of Chemistry
University of Aveiro
3810-193
Aveiro, Portugal
;
'Almeida, J.C. '
;CICECO - Aveiro Institute of Materials
Department of Materials and Ceramic Engineering
University of Aveiro
3810-193
Aveiro, Portugal
;
'Helguero, Luisa A. '
;Department of Chemistry
University of Aveiro
3810-193
Aveiro, Portugal
;
'Fernandes, M.H.V. '
;CICECO
Department of Chemistry
University of Aveiro
3810-193
Aveiro, Portugal
;
'Knowles, J.C. '
;Division of Biomaterials and Tissue Engineering, 
UCL Eastman Dental Institute, 
University College London, 
London, WC1X 8LD, UK
;
'Rocha, J.'
;CICECO-Aveiro Institute of Materials, 
Department of Chemistry, 
University of Aveiro, 3810-193 
Aveiro, Portugal
;
  
_audit_creation_method            SHELXL-97 
_chemical_name_systematic 
; 
 ? 
; 
_chemical_name_common             ? 
_chemical_melting_point           ? 
_chemical_formula_moiety          ? 
_chemical_formula_sum 
 'C8 H16 Ca O9 P2' 
_chemical_formula_weight          358.23 
  
loop_ 
 _atom_type_symbol 
 _atom_type_description 
 _atom_type_scat_dispersion_real 
 _atom_type_scat_dispersion_imag 
 _atom_type_scat_source 
 'C'  'C'   0.0033   0.0016 
 'International Tables Vol C Tables 4.2.6.8 and 6.1.1.4' 
 'H'  'H'   0.0000   0.0000 
 'International Tables Vol C Tables 4.2.6.8 and 6.1.1.4' 
 'O'  'O'   0.0106   0.0060 
 'International Tables Vol C Tables 4.2.6.8 and 6.1.1.4' 
 'P'  'P'   0.1023   0.0942 
 'International Tables Vol C Tables 4.2.6.8 and 6.1.1.4' 
 'Ca'  'Ca'   0.2262   0.3064 
 'International Tables Vol C Tables 4.2.6.8 and 6.1.1.4' 
  
_symmetry_cell_setting            Monoclinic 
_symmetry_space_group_name_H-M    C2/c 
  
loop_ 
 _symmetry_equiv_pos_as_xyz 
 'x, y, z' 
 '-x, y, -z+1/2' 
 'x+1/2, y+1/2, z' 
 '-x+1/2, y+1/2, -z+1/2' 
 '-x, -y, -z' 
 'x, -y, z-1/2' 
 '-x+1/2, -y+1/2, -z' 
 'x+1/2, -y+1/2, z-1/2' 
  
_cell_length_a                    22.6399(6) 
_cell_length_b                    7.0842(2) 
_cell_length_c                    9.1112(3) 
_cell_angle_alpha                 90.00 
_cell_angle_beta                  103.858(2) 
_cell_angle_gamma                 90.00 
_cell_volume                      1418.77(7) 
_cell_formula_units_Z             4 
_cell_measurement_temperature     180(2) 
_cell_measurement_reflns_used     1619 
_cell_measurement_theta_min       3.02 
_cell_measurement_theta_max       29.06 
  
_exptl_crystal_description        block 
_exptl_crystal_colour             colourless 
_exptl_crystal_size_max           0.17 
_exptl_crystal_size_mid           0.08 
_exptl_crystal_size_min           0.03 
_exptl_crystal_density_meas       ? 
_exptl_crystal_density_diffrn     1.677 
_exptl_crystal_density_method     'not measured' 
_exptl_crystal_F_000              744 
_exptl_absorpt_coefficient_mu     0.706 
_exptl_absorpt_correction_type    Multi-scan 
_exptl_absorpt_correction_T_min   0.8894 
_exptl_absorpt_correction_T_max   0.9791 
_exptl_absorpt_process_details    sadabs 
  
_exptl_special_details 
; 
 ? 
; 
  
_diffrn_ambient_temperature       180(2) 
_diffrn_radiation_wavelength      0.71073 
_diffrn_radiation_type            MoK\a 
_diffrn_radiation_source          'fine-focus sealed tube' 
_diffrn_radiation_monochromator   graphite 
_diffrn_measurement_device_type   'CCD area detector' 
_diffrn_measurement_method        'phi and omega scans' 
_diffrn_detector_area_resol_mean  ? 
_diffrn_standards_number          ? 
_diffrn_standards_interval_count  ? 
_diffrn_standards_interval_time   ? 
_diffrn_standards_decay_%         ? 
_diffrn_reflns_number             9285 
_diffrn_reflns_av_R_equivalents   0.0562 
_diffrn_reflns_av_sigmaI/netI     0.0563 
_diffrn_reflns_limit_h_min        -32 
_diffrn_reflns_limit_h_max        32 
_diffrn_reflns_limit_k_min        -10 
_diffrn_reflns_limit_k_max        10 
_diffrn_reflns_limit_l_min        -13 
_diffrn_reflns_limit_l_max        13 
_diffrn_reflns_theta_min          1.85 
_diffrn_reflns_theta_max          31.50 
_reflns_number_total              2331 
_reflns_number_gt                 1769 
_reflns_threshold_expression      >2sigma(I) 
  
_computing_data_collection        'Bruker SMART' 
_computing_cell_refinement        'Bruker SMART' 
_computing_data_reduction         'Bruker SAINT' 
_computing_structure_solution     'SHELXS-97 (Sheldrick, 1990)' 
_computing_structure_refinement   'SHELXL-97 (Sheldrick, 1997)' 
_computing_molecular_graphics     'Bruker SHELXTL' 
_computing_publication_material   'Bruker SHELXTL' 
  
_refine_special_details 
; 
 Refinement of F^2^ against ALL reflections.  The weighted R-factor wR and 
 goodness of fit S are based on F^2^, conventional R-factors R are based 
 on F, with F set to zero for negative F^2^. The threshold expression of 
 F^2^ > 2sigma(F^2^) is used only for calculating R-factors(gt) etc. and is 
 not relevant to the choice of reflections for refinement.  R-factors based 
 on F^2^ are statistically about twice as large as those based on F, and R- 
 factors based on ALL data will be even larger. 
; 
  
_refine_ls_structure_factor_coef  Fsqd 
_refine_ls_matrix_type            full 
_refine_ls_weighting_scheme       calc 
_refine_ls_weighting_details 
 'calc w=1/[\s^2^(Fo^2^)+(0.0397P)^2^+0.6303P] where P=(Fo^2^+2Fc^2^)/3' 
_atom_sites_solution_primary      direct 
_atom_sites_solution_secondary    difmap 
_atom_sites_solution_hydrogens    geom 
_refine_ls_hydrogen_treatment     mixed 
_refine_ls_extinction_method      SHELXL 
_refine_ls_extinction_coef        0.0030(6) 
_refine_ls_extinction_expression 
 'Fc^*^=kFc[1+0.001xFc^2^\l^3^/sin(2\q)]^-1/4^' 
_refine_ls_number_reflns          2331 
_refine_ls_number_parameters      108 
_refine_ls_number_restraints      1 
_refine_ls_R_factor_all           0.0604 
_refine_ls_R_factor_gt            0.0400 
_refine_ls_wR_factor_ref          0.0984 
_refine_ls_wR_factor_gt           0.0882 
_refine_ls_goodness_of_fit_ref    1.070 
_refine_ls_restrained_S_all       1.070 
_refine_ls_shift/su_max           0.001 
_refine_ls_shift/su_mean          0.000 
  
loop_ 
 _atom_site_label 
 _atom_site_type_symbol 
 _atom_site_fract_x 
 _atom_site_fract_y 
 _atom_site_fract_z 
 _atom_site_U_iso_or_equiv 
 _atom_site_adp_type 
 _atom_site_occupancy 
 _atom_site_symmetry_multiplicity 
 _atom_site_calc_flag 
 _atom_site_refinement_flags 
 _atom_site_disorder_assembly 
 _atom_site_disorder_group 
Ca1 Ca 1.0000 0.22535(7) 0.2500 0.01199(14) Uani 1 2 d S . . 
P1 P 0.90703(2) 0.58123(7) 0.40972(6) 0.01144(13) Uani 1 1 d . . . 
C1 C 0.83249(9) 0.6565(3) 0.3088(2) 0.0194(4) Uani 1 1 d . . . 
H1A H 0.8369 0.7682 0.2470 0.023 Uiso 1 1 calc R . . 
H1B H 0.8138 0.5545 0.2386 0.023 Uiso 1 1 calc R . . 
C2 C 0.78989(9) 0.7060(3) 0.4075(2) 0.0181(4) Uani 1 1 d . . . 
C3 C 0.75024(10) 0.5718(3) 0.4402(3) 0.0235(5) Uani 1 1 d . . . 
H3 H 0.7500 0.4482 0.3995 0.028 Uiso 1 1 calc R . . 
C4 C 0.71087(10) 0.6149(3) 0.5314(3) 0.0231(5) Uani 1 1 d . . . 
H4 H 0.6842 0.5205 0.5521 0.028 Uiso 1 1 calc R . . 
O1 O 0.93821(6) 0.49956(19) 0.29460(15) 0.0145(3) Uani 1 1 d . . . 
O2 O 0.89660(7) 0.41758(19) 0.51727(16) 0.0162(3) Uani 1 1 d . . . 
H2A H 0.9095(14) 0.437(4) 0.609(3) 0.044(9) Uiso 1 1 d . . . 
O3 O 0.94066(6) 0.74187(18) 0.50183(15) 0.0144(3) Uani 1 1 d . . . 
O4 O 1.0000 -0.1181(3) 0.2500 0.0382(7) Uani 1 2 d SD . . 
H4A H 0.9894(14) -0.188(4) 0.312(3) 0.046 Uiso 1 1 d D . . 
O5 O 1.07561(7) 0.1009(2) 0.12888(19) 0.0218(4) Uani 1 1 d . . . 
H5A H 1.0859(13) 0.178(5) 0.070(3) 0.050(9) Uiso 1 1 d . . . 
H5B H 1.0727(12) -0.011(4) 0.080(3) 0.037(8) Uiso 1 1 d . . . 
  
loop_ 
 _atom_site_aniso_label 
 _atom_site_aniso_U_11 
 _atom_site_aniso_U_22 
 _atom_site_aniso_U_33 
 _atom_site_aniso_U_23 
 _atom_site_aniso_U_13 
 _atom_site_aniso_U_12 
Ca1 0.0138(3) 0.0119(2) 0.0102(3) 0.000 0.0028(2) 0.000 
P1 0.0118(2) 0.0133(2) 0.0098(2) -0.00025(17) 0.00382(18) 0.00059(18) 
C1 0.0133(9) 0.0315(11) 0.0139(9) -0.0014(8) 0.0043(8) 0.0043(8) 
C2 0.0115(9) 0.0284(11) 0.0148(10) -0.0021(8) 0.0038(8) 0.0039(8) 
C3 0.0194(10) 0.0273(11) 0.0253(12) -0.0072(9) 0.0085(9) 0.0012(9) 
C4 0.0157(10) 0.0291(11) 0.0269(12) -0.0032(9) 0.0098(9) -0.0024(9) 
O1 0.0164(7) 0.0171(7) 0.0117(7) 0.0017(5) 0.0069(5) 0.0041(5) 
O2 0.0243(8) 0.0160(7) 0.0102(7) -0.0001(5) 0.0076(6) -0.0044(6) 
O3 0.0175(7) 0.0132(6) 0.0120(6) 0.0000(5) 0.0022(5) -0.0014(5) 
O4 0.0460(16) 0.0172(11) 0.065(2) 0.000 0.0408(15) 0.000 
O5 0.0297(9) 0.0144(7) 0.0260(9) -0.0004(6) 0.0161(7) -0.0005(6) 
  
_geom_special_details 
; 
 All esds (except the esd in the dihedral angle between two l.s. planes) 
 are estimated using the full covariance matrix.  The cell esds are taken 
 into account individually in the estimation of esds in distances, angles 
 and torsion angles; correlations between esds in cell parameters are only 
 used when they are defined by crystal symmetry.  An approximate (isotropic) 
 treatment of cell esds is used for estimating esds involving l.s. planes. 
; 
  
loop_ 
 _geom_bond_atom_site_label_1 
 _geom_bond_atom_site_label_2 
 _geom_bond_distance 
 _geom_bond_site_symmetry_2 
 _geom_bond_publ_flag 
Ca1 O3 2.3486(14) 5_766 ? 
Ca1 O3 2.3487(14) 6_565 ? 
Ca1 O5 2.4147(16) . ? 
Ca1 O5 2.4147(16) 2_755 ? 
Ca1 O4 2.433(2) . ? 
Ca1 O1 2.4835(14) 2_755 ? 
Ca1 O1 2.4835(14) . ? 
P1 O3 1.5076(14) . ? 
P1 O1 1.5126(14) . ? 
P1 O2 1.5719(14) . ? 
P1 C1 1.798(2) . ? 
C1 C2 1.509(3) . ? 
C1 H1A 0.9900 . ? 
C1 H1B 0.9900 . ? 
C2 C4 1.388(3) 7_666 ? 
C2 C3 1.388(3) . ? 
C3 C4 1.390(3) . ? 
C3 H3 0.9500 . ? 
C4 C2 1.388(3) 7_666 ? 
C4 H4 0.9500 . ? 
O2 H2A 0.83(3) . ? 
O3 Ca1 2.3487(14) 5_766 ? 
O4 H4A 0.831(16) . ? 
O5 H5A 0.84(3) . ? 
O5 H5B 0.90(3) . ? 
  
loop_ 
 _geom_angle_atom_site_label_1 
 _geom_angle_atom_site_label_2 
 _geom_angle_atom_site_label_3 
 _geom_angle 
 _geom_angle_site_symmetry_1 
 _geom_angle_site_symmetry_3 
 _geom_angle_publ_flag 
O3 Ca1 O3 168.65(7) 5_766 6_565 ? 
O3 Ca1 O5 99.87(5) 5_766 . ? 
O3 Ca1 O5 84.31(5) 6_565 . ? 
O3 Ca1 O5 84.30(5) 5_766 2_755 ? 
O3 Ca1 O5 99.87(5) 6_565 2_755 ? 
O5 Ca1 O5 137.18(8) . 2_755 ? 
O3 Ca1 O4 95.67(3) 5_766 . ? 
O3 Ca1 O4 95.67(3) 6_565 . ? 
O5 Ca1 O4 68.59(4) . . ? 
O5 Ca1 O4 68.59(4) 2_755 . ? 
O3 Ca1 O1 82.27(5) 5_766 2_755 ? 
O3 Ca1 O1 88.85(5) 6_565 2_755 ? 
O5 Ca1 O1 73.86(5) . 2_755 ? 
O5 Ca1 O1 148.11(5) 2_755 2_755 ? 
O4 Ca1 O1 141.46(3) . 2_755 ? 
O3 Ca1 O1 88.85(5) 5_766 . ? 
O3 Ca1 O1 82.27(5) 6_565 . ? 
O5 Ca1 O1 148.11(5) . . ? 
O5 Ca1 O1 73.86(5) 2_755 . ? 
O4 Ca1 O1 141.46(3) . . ? 
O1 Ca1 O1 77.08(6) 2_755 . ? 
O3 P1 O1 114.67(8) . . ? 
O3 P1 O2 109.94(8) . . ? 
O1 P1 O2 108.36(8) . . ? 
O3 P1 C1 110.36(9) . . ? 
O1 P1 C1 107.19(9) . . ? 
O2 P1 C1 105.93(9) . . ? 
C2 C1 P1 114.80(14) . . ? 
C2 C1 H1A 108.6 . . ? 
P1 C1 H1A 108.6 . . ? 
C2 C1 H1B 108.6 . . ? 
P1 C1 H1B 108.6 . . ? 
H1A C1 H1B 107.5 . . ? 
C4 C2 C3 118.01(19) 7_666 . ? 
C4 C2 C1 121.5(2) 7_666 . ? 
C3 C2 C1 120.5(2) . . ? 
C2 C3 C4 121.2(2) . . ? 
C2 C3 H3 119.4 . . ? 
C4 C3 H3 119.4 . . ? 
C2 C4 C3 120.8(2) 7_666 . ? 
C2 C4 H4 119.6 7_666 . ? 
C3 C4 H4 119.6 . . ? 
P1 O1 Ca1 141.94(8) . . ? 
P1 O2 H2A 116(2) . . ? 
P1 O3 Ca1 134.96(8) . 5_766 ? 
Ca1 O4 H4A 127(2) . . ? 
Ca1 O5 H5A 113(2) . . ? 
Ca1 O5 H5B 124.6(17) . . ? 
H5A O5 H5B 105(3) . . ? 
  
loop_ 
 _geom_torsion_atom_site_label_1 
 _geom_torsion_atom_site_label_2 
 _geom_torsion_atom_site_label_3 
 _geom_torsion_atom_site_label_4 
 _geom_torsion 
 _geom_torsion_site_symmetry_1 
 _geom_torsion_site_symmetry_2 
 _geom_torsion_site_symmetry_3 
 _geom_torsion_site_symmetry_4 
 _geom_torsion_publ_flag 
O3 P1 C1 C2 -66.18(18) . . . . ? 
O1 P1 C1 C2 168.31(15) . . . . ? 
O2 P1 C1 C2 52.77(18) . . . . ? 
P1 C1 C2 C4 86.0(2) . . . 7_666 ? 
P1 C1 C2 C3 -93.7(2) . . . . ? 
C4 C2 C3 C4 0.0(4) 7_666 . . . ? 
C1 C2 C3 C4 179.8(2) . . . . ? 
C2 C3 C4 C2 0.0(4) . . . 7_666 ? 
O3 P1 O1 Ca1 102.76(13) . . . . ? 
O2 P1 O1 Ca1 -20.45(16) . . . . ? 
C1 P1 O1 Ca1 -134.37(13) . . . . ? 
O3 Ca1 O1 P1 -45.08(13) 5_766 . . . ? 
O3 Ca1 O1 P1 141.99(14) 6_565 . . . ? 
O5 Ca1 O1 P1 -152.07(12) . . . . ? 
O5 Ca1 O1 P1 39.32(13) 2_755 . . . ? 
O4 Ca1 O1 P1 52.58(16) . . . . ? 
O1 Ca1 O1 P1 -127.42(16) 2_755 . . . ? 
O1 P1 O3 Ca1 -104.05(11) . . . 5_766 ? 
O2 P1 O3 Ca1 18.31(13) . . . 5_766 ? 
C1 P1 O3 Ca1 134.80(11) . . . 5_766 ? 
  
loop_ 
 _geom_hbond_atom_site_label_D 
 _geom_hbond_atom_site_label_H 
 _geom_hbond_atom_site_label_A 
 _geom_hbond_distance_DH 
 _geom_hbond_distance_HA 
 _geom_hbond_distance_DA 
 _geom_hbond_angle_DHA 
 _geom_hbond_site_symmetry_A 
O2 H2A O1  0.83(3) 1.72(3) 2.5449(19) 174(3) 6_566 
O4 H4A O1  0.831(16) 2.48(3) 3.119(3) 134(3) 1_545 
O4 H4A O3  0.831(16) 2.315(19) 3.0871(16) 155(3) 1_545 
O5 H5A O2  0.84(3) 1.95(3) 2.757(2) 160(3) 2_755 
O5 H5B O3  0.90(3) 1.90(3) 2.795(2) 171(3) 2_745 
  
_diffrn_measured_fraction_theta_max    0.986 
_diffrn_reflns_theta_full              31.50 
_diffrn_measured_fraction_theta_full   0.986 
_refine_diff_density_max    0.618 
_refine_diff_density_min   -0.440 
_refine_diff_density_rms    0.099 
